# Supplementary material for: Atypical DNA methylation of genes encoding cysteine-rich peptides in Arabidopsis thaliana
Source: PubMed Central journal article supplement (PMC3422182; doi:10.1186/1471-2229-12-51), 2012-04-19
Supplement: 1471-2229-12-51-S1.pdf [file 1471-2229-12-51-S1.pdf]

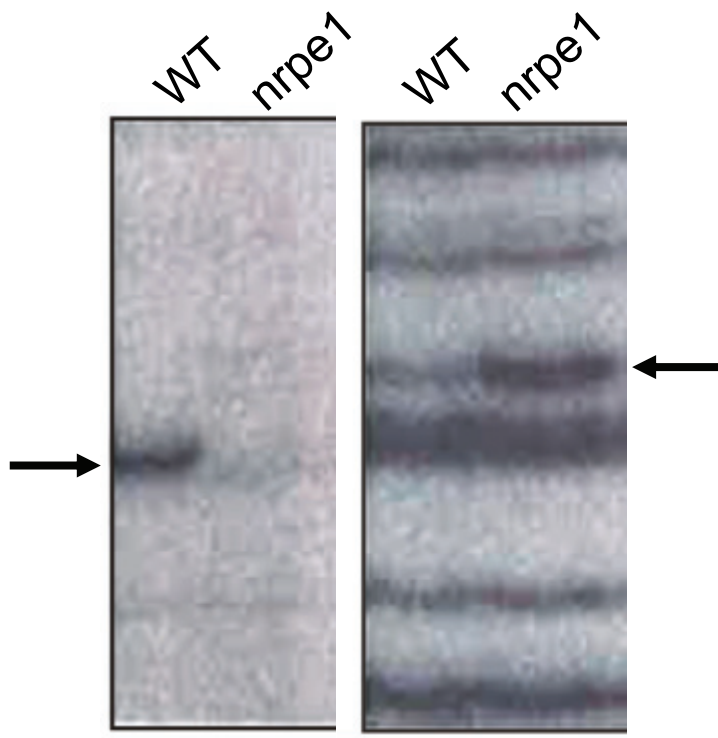

**Supplementary Figure 1. Differentially accumulating fragments in MSAP analysis**  
Polymorphic bands between wild-type (WT) and *nrpe1* mutant seedlings on MSAP gels (arrows). These correspond to the SAT5 monomers on chromosomes 2 and 5 respectively, containing the pseudogenes At2g18042 and At5g60978 (Table 1).
