# Supplementary material for: Atypical DNA methylation of genes encoding cysteine-rich peptides in Arabidopsis thaliana
Source: PubMed Central journal article supplement (PMC3422182; doi:10.1186/1471-2229-12-51), 2012-04-19
Supplement: 1471-2229-12-51-S2.pdf [file 1471-2229-12-51-S2.pdf]

Supplementary Figure 2. Sequence alignment

|                 |       | Section 1   |       |         |         |         |           |              |           |          |           |         |          |   |   |   |   |   |   |
|-----------------|-------|-------------|-------|---------|---------|---------|-----------|--------------|-----------|----------|-----------|---------|----------|---|---|---|---|---|---|
|                 |       | (1)         | 1     | 10      | 20      | 30      | 40        | 50           |           |          |           |         |          |   |   |   |   |   |   |
| ATSAT5Satellite | (1)   | TTATGTT     | CA    | T       | TGTTTT  | CATGCC  | AGATCCG   | AACTGCTCT    | T         | CCAACCGT | TT        |         |          |   |   |   |   |   |   |
| chr.2_SAT5      | (1)   | TTATGTT     | CA    | T       | TGTTTT  | CATGCC  | AGATCCG   | AACTGCTCT    | T         | CCAACCGT | TT        |         |          |   |   |   |   |   |   |
| chr.3_SAT5      | (1)   | TTATGTT     | CA    | A       | TGTTTT  | CATGCC  | CGATCCG   | AACTGCTCT    | G         | CCAACCGT | AT        |         |          |   |   |   |   |   |   |
| Chr.4_SAT5      | (1)   | -----       |       |         |         |         |           |              |           |          |           |         |          |   |   |   |   |   |   |
| Chr.5_SAT5      | (1)   | -----       |       |         |         |         |           |              |           |          |           |         |          |   |   |   |   |   |   |
| AT2G18042       | (1)   | -----       |       |         |         |         |           |              |           |          |           |         |          |   |   |   |   |   |   |
| AT3G42565       | (1)   | -----       |       |         |         |         |           |              |           |          |           |         |          |   |   |   |   |   |   |
| AT4G09545       | (1)   | -----       |       |         |         |         |           |              |           |          |           |         |          |   |   |   |   |   |   |
| AT5G60978       | (1)   | -----       |       |         |         |         |           |              |           |          |           |         |          |   |   |   |   |   |   |
| Consensus       | (1)   | TTATGTT     | CA    | T       | TGTTTT  | CATGCC  | CGATCCG   | AACTGCTCT    | T         | CCAACCGT | TT        |         |          |   |   |   |   |   |   |
|                 |       | Section 2   |       |         |         |         |           |              |           |          |           |         |          |   |   |   |   |   |   |
|                 |       | (51)        | 51    | 60      | 70      | 80      | 90        | 100          |           |          |           |         |          |   |   |   |   |   |   |
| ATSAT5Satellite | (51)  | AAC         | CCGCT | A       | T       | CA      | GAAACTC   | T            | TCTC      | C        | TCTAAGTTT | AGTGTTA | ACAAGTCA |   |   |   |   |   |   |
| chr.2_SAT5      | (1)   | -----       |       |         |         |         |           |              |           |          |           |         |          |   |   |   |   |   |   |
| chr.3_SAT5      | (51)  | AAT         | CCGCA | T       | TCTA    | C       | AAACTC    | C            | TCTC      | G        | TCTAAGTTT | AGTGTTA | ACAAGTCA |   |   |   |   |   |   |
| Chr.4_SAT5      | (1)   | -----       |       |         |         |         |           |              |           |          |           |         | ACAAATCA |   |   |   |   |   |   |
| Chr.5_SAT5      | (1)   | -----       |       |         |         |         |           |              |           |          |           |         |          |   |   |   |   |   |   |
| AT2G18042       | (1)   | -----       |       |         |         |         |           |              |           |          |           |         |          |   |   |   |   |   |   |
| AT3G42565       | (1)   | -----       |       |         |         |         |           |              |           |          |           |         |          |   |   |   |   |   |   |
| AT4G09545       | (1)   | -----       |       |         |         |         |           |              |           |          |           |         |          |   |   |   |   |   |   |
| AT5G60978       | (1)   | -----       |       |         |         |         |           |              |           |          |           |         |          |   |   |   |   |   |   |
| Consensus       | (51)  | AATCCGCT    | TTTCT | AGAAACT | C       | T       | TCTC      | G            | TCTAAGTTT | AGTGTTA  | ACAAGTCA  |         |          |   |   |   |   |   |   |
|                 |       | Section 3   |       |         |         |         |           |              |           |          |           |         |          |   |   |   |   |   |   |
|                 |       | (101)       | 101   | 110     | 120     | 130     | 140       | 150          |           |          |           |         |          |   |   |   |   |   |   |
| ATSAT5Satellite | (101) | TGGAGAACC   | T     | CAT     | TGTATAG | AAGTTTT | TACAAACCA | AACTTT       | AGATTGAT  |          |           |         |          |   |   |   |   |   |   |
| chr.2_SAT5      | (1)   | -----       |       |         |         |         |           |              |           |          |           | GAT     |          |   |   |   |   |   |   |
| chr.3_SAT5      | (101) | TGGAGAACC   | C     | CAT     | TGTATAG | AAGTTTT | TACAAACCA | AACTTT       | AGATTGAT  |          |           |         |          |   |   |   |   |   |   |
| Chr.4_SAT5      | (9)   | TGGAGAACC   | -     | CAT     | TGTATA  | AAA     | A         | TTTTACAAACCA | AACTTT    | AGATTGAT | CAAT      |         |          |   |   |   |   |   |   |
| Chr.5_SAT5      | (1)   | -----       |       |         |         |         |           |              |           |          |           |         |          |   |   |   |   |   |   |
| AT2G18042       | (1)   | -----       |       |         |         |         |           |              |           |          |           |         |          |   |   |   |   |   |   |
| AT3G42565       | (1)   | -----       |       |         |         |         |           |              |           |          |           |         |          |   |   |   |   |   |   |
| AT4G09545       | (1)   | -----       |       |         |         |         |           |              |           |          |           |         |          |   |   |   |   |   |   |
| AT5G60978       | (1)   | -----       |       |         |         |         |           |              |           |          |           |         |          |   |   |   |   |   |   |
| Consensus       | (101) | TGGAGAACC   | T     | CAT     | TGTATAG | AAGTTTT | TACAAACCA | AACTTT       | AGATTGAT  |          |           |         |          |   |   |   |   |   |   |
|                 |       | Section 4   |       |         |         |         |           |              |           |          |           |         |          |   |   |   |   |   |   |
|                 |       | (151)       | 151   | 160     | 170     | 180     | 190       | 200          |           |          |           |         |          |   |   |   |   |   |   |
| ATSAT5Satellite | (151) | TCAAATAATTT | -     | C       | A       | G       | AAGAAAAT  | A            | T         | TATAAAT  | C         | G       | ATTTATT  | G | T | T | T | T | A |
| chr.2_SAT5      | (4)   | TCAAATAATTT | T     | C       | T       | A       | G         | A            | A         | A        | T         | T       | C        | G | A | A | A | A | A |
| chr.3_SAT5      | (151) | TCAAATAATTT | T     | C       | A       | G       | A         | A            | A         | A        | T         | T       | C        | A | A | A | A | A | A |
| Chr.4_SAT5      | (58)  | TCAAATAATTT | T     | C       | T       | A       | G         | A            | A         | A        | T         | A       | T        | A | T | A | T | A | T |
| Chr.5_SAT5      | (1)   | -----       |       |         |         |         |           |              |           |          |           |         |          |   |   |   |   |   |   |
| AT2G18042       | (1)   | -----       |       |         |         |         |           |              |           |          |           |         |          |   |   |   |   |   |   |
| AT3G42565       | (1)   | -----       |       |         |         |         |           |              |           |          |           |         |          |   |   |   |   |   |   |
| AT4G09545       | (1)   | -----       |       |         |         |         |           |              |           |          |           |         |          |   |   |   |   |   |   |
| AT5G60978       | (1)   | -----       |       |         |         |         |           |              |           |          |           |         |          |   |   |   |   |   |   |
| Consensus       | (151) | TCAAATAATTT | T     | C       | T       | A       | G         | A            | A         | A        | T         | A       | T        | A | T | A | T | A | T |

Supplementary Figure 2. Sequence alignment

|                 |       | Section 5                                           |                  |                                           |                            |                   |            |             |         |         |        |   |   |
|-----------------|-------|-----------------------------------------------------|------------------|-------------------------------------------|----------------------------|-------------------|------------|-------------|---------|---------|--------|---|---|
|                 |       | 201                                                 | 210              | 220                                       | 230                        | 240               | 250        |             |         |         |        |   |   |
| ATSAT5Satellite | (201) | TTT                                                 | GAGATATA         | AACC                                      | -GATGATTGATTAATTATGTGAAGCC | ---               | ATT        |             |         |         |        |   |   |
| chr.2_SAT5      | (54)  | TTT                                                 | TGAGATATA        | TACT                                      | -GCTAACTGATTAATTATGTGAAGCC | ---               | GTT        |             |         |         |        |   |   |
| chr.3_SAT5      | (201) | TTT                                                 | GAGATATA         | TACC                                      | -GATGAATGATTAATTATGTGAAGCC | ---               | GTT        |             |         |         |        |   |   |
| Chr.4_SAT5      | (108) | TTT                                                 | TGAGATATA        | AAACTG                                    | CTGATTGATTAATTATGTGAAGT    | CATA              | C          | GTT         |         |         |        |   |   |
| Chr.5_SAT5      | (1)   | -----                                               |                  |                                           |                            |                   |            |             |         |         |        |   |   |
| AT2G18042       | (1)   | -----                                               |                  |                                           |                            |                   |            |             |         |         |        |   |   |
| AT3G42565       | (1)   | -----                                               |                  |                                           |                            |                   |            |             |         |         |        |   |   |
| AT4G09545       | (1)   | -----                                               |                  |                                           |                            |                   |            |             |         |         |        |   |   |
| AT5G60978       | (1)   | -----                                               |                  |                                           |                            |                   |            |             |         |         |        |   |   |
| Consensus       | (201) | TTTTGAGATATATACCTGGTGATTGATTAATTATGTGAAGCCATAGGTTT  |                  |                                           |                            |                   |            |             |         |         |        |   |   |
|                 |       | Section 6                                           |                  |                                           |                            |                   |            |             |         |         |        |   |   |
|                 |       | 251                                                 | 260              | 270                                       | 280                        | 290               | 300        |             |         |         |        |   |   |
| ATSAT5Satellite | (245) | TACTTTTATTTTCTCT                                    | -                | TTGTAGTCAATATTTCTTAGTTAATGTTAC            | GTG                        |                   |            |             |         |         |        |   |   |
| chr.2_SAT5      | (100) | C                                                   | ACTTTTATTG       | -CTCT                                     | -TTGTAGTCAATATTTT          | CAAGTTAATGTTACTTG |            |             |         |         |        |   |   |
| chr.3_SAT5      | (246) | A                                                   | ACTTTTGATTTTCTCT | -                                         | TTGTAGTCAATATTTT           | TTAGTTAATGTTACTTG |            |             |         |         |        |   |   |
| Chr.4_SAT5      | (158) | TACTTTTATTTTCTCTCTT                                 | T                | TAATCAATATTTCTTAGTTAATGTT                 | G                          | C                 |            |             |         |         |        |   |   |
| Chr.5_SAT5      | (1)   | -----                                               |                  |                                           |                            |                   |            |             |         |         |        |   |   |
| AT2G18042       | (1)   | -----                                               |                  |                                           |                            |                   |            |             |         |         |        |   |   |
| AT3G42565       | (1)   | -----                                               |                  |                                           |                            |                   |            |             |         |         |        |   |   |
| AT4G09545       | (1)   | -----                                               |                  |                                           |                            |                   |            |             |         |         |        |   |   |
| AT5G60978       | (1)   | -----                                               |                  |                                           |                            |                   |            |             |         |         |        |   |   |
| Consensus       | (251) | TACTTTTATTTTCTCTCTTGTAGTCAATATTTCTTAGTTAATGTTACTTG  |                  |                                           |                            |                   |            |             |         |         |        |   |   |
|                 |       | Section 7                                           |                  |                                           |                            |                   |            |             |         |         |        |   |   |
|                 |       | 301                                                 | 310              | 320                                       | 330                        | 340               | 350        |             |         |         |        |   |   |
| ATSAT5Satellite | (294) | TTT                                                 | CACACA           | TGGAGTTTCAACTATATT                        | -AAATTT                    | CTAAAACGGCTAATCA  |            |             |         |         |        |   |   |
| chr.2_SAT5      | (148) | TTT                                                 | T                | ---CT                                     | TGGAGTTTCAACT              | CTATTTAT          | CTTATAAAAC | AACTA       | T       | TGA     |        |   |   |
| chr.3_SAT5      | (295) | TTT                                                 | CACACA           | TGGAGTTTCAACTATATTTAAATTTATAAAACGGCTAATCA |                            |                   |            |             |         |         |        |   |   |
| Chr.4_SAT5      | (208) | TTT                                                 | TACACT           | TGGAGTTTC                                 | GTCT                       | TTATTT            | TG         | ATTTATAAAAC | TG      | T       | TAATCA |   |   |
| Chr.5_SAT5      | (1)   | -----                                               |                  |                                           |                            |                   |            |             |         |         |        |   |   |
| AT2G18042       | (1)   | -----                                               |                  |                                           |                            |                   |            |             |         |         |        |   |   |
| AT3G42565       | (1)   | -----                                               |                  |                                           |                            |                   |            |             |         |         |        |   |   |
| AT4G09545       | (1)   | -----                                               |                  |                                           |                            |                   |            |             |         |         |        |   |   |
| AT5G60978       | (1)   | -----                                               |                  |                                           |                            |                   |            |             |         |         |        |   |   |
| Consensus       | (301) | TTTTTACACTTGGAGTTTCAACTATATTTAAATTTATAAAACGGCTAATCA |                  |                                           |                            |                   |            |             |         |         |        |   |   |
|                 |       | Section 8                                           |                  |                                           |                            |                   |            |             |         |         |        |   |   |
|                 |       | 351                                                 | 360              | 370                                       | 380                        | 390               | 400        |             |         |         |        |   |   |
| ATSAT5Satellite | (343) | AATACCTAATTAAAG                                     | T                | ATTCAAAGATGTTAAATTA                       | AAA                        | -AAAATTAATAT      | G          |             |         |         |        |   |   |
| chr.2_SAT5      | (195) | AAT                                                 | TTCTAATTAAAG     | CAT                                       | C                          | CAAAGATGTTAAAG    | TAAAG      | -A          | T       | AATTAAT | G      | T | C |
| chr.3_SAT5      | (345) | AATACCTAATTAAAG                                     | T                | ATTCAAAGATGTTAAAG                         | TTAAAG                     | AAAAT             | CTATAT     | G           |         |         |        |   |   |
| Chr.4_SAT5      | (258) | AATACCTAATTAA                                       | CC               | ATTCAAAGATGTTA                            | --                         | TTAAA             | -A         | T           | AATTAAT | A       | T      | C |   |
| Chr.5_SAT5      | (1)   | -----                                               |                  |                                           |                            |                   |            |             |         |         |        |   |   |
| AT2G18042       | (1)   | -----                                               |                  |                                           |                            |                   |            |             |         |         |        |   |   |
| AT3G42565       | (1)   | -----                                               |                  |                                           |                            |                   |            |             |         |         |        |   |   |
| AT4G09545       | (1)   | -----                                               |                  |                                           |                            |                   |            |             |         |         |        |   |   |
| AT5G60978       | (1)   | -----                                               |                  |                                           |                            |                   |            |             |         |         |        |   |   |
| Consensus       | (351) | AATACCTAATTAAAGTATTCAAAGATGTTAAATTAAGATAATTAATATG   |                  |                                           |                            |                   |            |             |         |         |        |   |   |

Supplementary Figure 2. Sequence alignment

Section 9

|                 | (401) | 401                                                  | 410             | 420       | 430              | 440              | 450             |
|-----------------|-------|------------------------------------------------------|-----------------|-----------|------------------|------------------|-----------------|
| ATSAT5Satellite | (392) | A                                                    | CAGTTTCACATTTCA | A TC --   | CATATAAATAAGCAAG | GATT             | TTATTGTTA       |
| chr.2_SAT5      | (244) | A                                                    | TAGTTTCACATTTCA | TTC --    | CATATAAATAAATCAA | AAGTCT           | TTATTGTTG       |
| chr.3_SAT5      | (395) | A                                                    | TAGTTTCACATTTCA | A TATTC   | CATATAAATAAGCAAG | GATT             | TTATTGTTA       |
| Chr.4_SAT5      | (305) | A                                                    | CAGTTT          | TACATTTCA | TTC --           | CATATAAATAAGCAAG | GAATCTTTATTGTTG |
| Chr.5_SAT5      | (1)   | -----                                                |                 |           |                  |                  |                 |
| AT2G18042       | (1)   | -----                                                |                 |           |                  |                  |                 |
| AT3G42565       | (1)   | -----                                                |                 |           |                  |                  |                 |
| AT4G09545       | (1)   | -----                                                |                 |           |                  |                  |                 |
| AT5G60978       | (1)   | -----                                                |                 |           |                  |                  |                 |
| Consensus       | (401) | ATAGTTTCACATTTCA TTCATTCATATAAATAAGCAAGGATTTTATTGTTG |                 |           |                  |                  |                 |

Section 10

|                 | (451) | 451                                                 | 460   | 470                    | 480      | 490          | 500            |
|-----------------|-------|-----------------------------------------------------|-------|------------------------|----------|--------------|----------------|
| ATSAT5Satellite | (440) | TTCATCAATCAAAAACAAACAAAGCATTAAAGCATATA              | GTTG  | -                      | CTATACTA |              |                |
| chr.2_SAT5      | (292) | TTCATCAATCAAAA                                      | GCAAA | TATAAC                 | CTT      | CAGCATATA    | T TTGGCTATACTA |
| chr.3_SAT5      | (445) | TTCATCAATCAAAA                                      | A     | AAACAAAGCATTAAAGCATATA | GTTG     | -            | CTATACTA       |
| Chr.4_SAT5      | (353) | TTCATCAATCAAAAACAAACA                               | G     | AGCATTAAAGCATATA       | T        | TTGGCTATACTA |                |
| Chr.5_SAT5      | (1)   | -----                                               |       |                        |          |              |                |
| AT2G18042       | (1)   | -----                                               |       |                        |          |              |                |
| AT3G42565       | (1)   | -----                                               |       |                        |          |              |                |
| AT4G09545       | (1)   | -----                                               |       |                        |          |              |                |
| AT5G60978       | (1)   | -----                                               |       |                        |          |              |                |
| Consensus       | (451) | TTCATCAATCAAAAACAAACAAAGCATTAAAGCATATATTTGGCTATACTA |       |                        |          |              |                |

Section 11

|                 | (501) | 501                                                 | 510    | 520      | 530              | 540      | 550    |          |
|-----------------|-------|-----------------------------------------------------|--------|----------|------------------|----------|--------|----------|
| ATSAT5Satellite | (489) | AGA                                                 | CTTTTT | A ---    | CTCAATTTCTCATT   | ATGTCTAT | CAAAAA | TGTGTTTT |
| chr.2_SAT5      | (342) | AGG                                                 | TTCTTT | T --     | TACTCAATTTCTCATT | ATGTCTAT | AAAAAA | TATGCTTT |
| chr.3_SAT5      | (494) | AGA                                                 | CTTT   | GT A --- | CTGAATTTCTCATT   | ATGTCTAT | CAAAAA | TGTGTTTT |
| Chr.4_SAT5      | (403) | AGG                                                 | CTTTTT | TATT     | TCTCAGTTTCTCATT  | ATGCCTAT | CAAAAA | TGTGTTTT |
| Chr.5_SAT5      | (1)   | -----                                               |        |          |                  |          |        |          |
| AT2G18042       | (1)   | -----                                               |        |          |                  |          |        |          |
| AT3G42565       | (1)   | -----                                               |        |          |                  |          |        |          |
| AT4G09545       | (1)   | -----                                               |        |          |                  |          |        |          |
| AT5G60978       | (1)   | -----                                               |        |          |                  |          |        |          |
| Consensus       | (501) | AGGCTTTTTTATTTCTCAATTTCTCATTATGTCTATCAAAAAATGTGTTTT |        |          |                  |          |        |          |

Section 12

|                 | (551) | 551                                             | 560          | 570   | 580           | 590       | 600       |        |
|-----------------|-------|-------------------------------------------------|--------------|-------|---------------|-----------|-----------|--------|
| ATSAT5Satellite | (535) | TACT                                            | TCTAGCGGTTCT | TATG  | TATCATAGTTTCT | GTAAATGCT | CAATTG    | GCC    |
| chr.2_SAT5      | (390) | CAC                                             | TCTAGCGGTTCT | TATGC | CATCATCGTTTCT | GTAAATGCT | TAGATG    | GCC    |
| chr.3_SAT5      | (540) | CCCT                                            | TCTATATGTTCT | TATG  | TATCATAGTTTCT | GTAAATGCT | CAATTG    | GCC    |
| Chr.4_SAT5      | (453) | CAC                                             | TCTAGTGGTTCT | TATGC | CATCATAGTTTCT | GTAAATGCT | CAGTTA    | CCT    |
| Chr.5_SAT5      | (31)  | TTAT                                            | TATAGCGGTT   | ATG   | TGCGTTT       | TGTCTC    | GTAAATGCT | CAACTA |
| AT2G18042       | (23)  | CAC                                             | TCTAGCGGTTCT | TATGC | CATCATCGTTTCT | GTAAATGCT | TAGATG    | GCC    |
| AT3G42565       | (23)  | CCCT                                            | TCTATATGTTCT | TATG  | TATCATAGTTTCT | GTAAATGCT | CAATTG    | GCC    |
| AT4G09545       | (23)  | CAC                                             | TCTAGTGGTTCT | TATGC | CATCATAGTTTCT | GTAAATGCT | CAGTTA    | CCT    |
| AT5G60978       | (23)  | TTAT                                            | TATAGCGGTT   | ATG   | TGCGTTT       | TGTCTC    | GTAAATGCT | CAACTA |
| Consensus       | (551) | CACTTCTAGCGGTTCTATGCATCATAGTTTCTGTAAATGCTCAATTG |              |       |               |           |           |        |

Supplementary Figure 2. Sequence alignment

Section 13

|                 | (601) | 601                  | 610  | 620  | 630  | 640   | 650     |      |       |       |       |      |       |
|-----------------|-------|----------------------|------|------|------|-------|---------|------|-------|-------|-------|------|-------|
| ATSAT5Satellite | (585) | CAGTTTCCGGCTC        | AAC  | TTCC | TTTT | TGTTT | CCGTTCC | AAC  | TGATT | CTGG  |       |      |       |
| chr.2_SAT5      | (440) | CAGTTTCCGGCTCCAT     | TTCC | TTTT | T    | CATTT | CTA     | TTCC | GAACC | GATT  | CTGG  |      |       |
| chr.3_SAT5      | (590) | CAGTTTCCAGCTCAAC     | TTCC | TTTT | CC   | GTTT  | CCGTTCC | AAC  | TGATT | TCTGG |       |      |       |
| Chr.4_SAT5      | (503) | CAGTTTCCGGCTCCGT     | TTCT | TTTT | CC   | ATTT  | T       | CGTT | T     | CAACC | GATT  | CTGG |       |
| Chr.5_SAT5      | (81)  | CA-----              | AT   | TTCC | TTTT | CC    | ATTT    | T    | CA    | TTCC  | TAACC | GATT | TCTGG |
| AT2G18042       | (73)  | CAGTTTCCGGCTCCAT     | TTCC | TTTT | T    | CATTT | CTA     | TTCC | GAACC | GATT  | CTGG  |      |       |
| AT3G42565       | (73)  | CAGTTTCCAGCTCAAC     | TTCC | TTTT | CC   | GTTT  | CCGTTCC | AAC  | TGATT | TCTGG |       |      |       |
| AT4G09545       | (73)  | CAGTTTCCGGCTCCGT     | TTCT | TTTT | CC   | ATTT  | T       | CGTT | T     | CAACC | GATT  | CTGG |       |
| AT5G60978       | (73)  | CA-----              | AT   | TTCC | TTTT | CC    | ATTT    | T    | CA    | TTCC  | TAACC | GATT | TCTGG |
| Consensus       | (601) | CAGTTTCCGGCTCCATTTCC | TTTT | CC   | ATTT | CC    | GTTTCC  | AACC | GATT  | CTGG  |       |      |       |

Section 14

|                 | (651) | 651                 | 660       | 670        | 680              | 690        | 700              |                  |
|-----------------|-------|---------------------|-----------|------------|------------------|------------|------------------|------------------|
| ATSAT5Satellite | (635) | A-----              | TTACCTGAT | TATAAC     | AAAATGTT         | TC         | TCATCCGTGATGGATA |                  |
| chr.2_SAT5      | (490) | TATG                | T         | CAGGAT     | TTACCTGAC        | ATAAC      | AAAATGTTGG       | TCATCCGTGATGGATA |
| chr.3_SAT5      | (640) | A-----              | TTACCTGAT | TATAAC     | AAAATGTT         | GG         | TCATCCGTGATGGATA |                  |
| Chr.4_SAT5      | (553) | AATGCCAGGAT         | TTACCTGAT | TATAAC     | G                | AAAATGTTGG | TCATCCGTGATGGATA |                  |
| Chr.5_SAT5      | (119) | TATGCCAGGAT         | TTACCTGAT | TATAAC     | A                | AAAATGTTGG | TCATCCGTGATGGATA |                  |
| AT2G18042       | (123) | TATG                | T         | CAGGAT     | TTACCTGAC        | ATAAC      | AAAATGTTGG       | TCATCCGTGATGGATA |
| AT3G42565       | (123) | A-----              | TTACCTGAT | TATAAC     | AAAATGTT         | GG         | TCATCCGTGATGGATA |                  |
| AT4G09545       | (123) | AATGCCAGGAT         | TTACCTGAT | TATAAC     | G                | AAAATGTTGG | TCATCCGTGATGGATA |                  |
| AT5G60978       | (111) | TATGCCAGGAT         | TTACCTGAT | TATAAC     | A                | AAAATGTTGG | TCATCCGTGATGGATA |                  |
| Consensus       | (651) | AATGCCAGGATTACCTGAT | TATAAC    | AAAATGTTGG | TCATCCGTGATGGATA |            |                  |                  |

Section 15

|                 | (701) | 701  | 710          | 720               | 730         | 740        | 750       |         |          |
|-----------------|-------|------|--------------|-------------------|-------------|------------|-----------|---------|----------|
| ATSAT5Satellite | (676) | TTCC | TGGATGCATTG  | CAGAGA            | TTTCTCAATC  | CATTTT     | CACTGGAAA | GTTT    |          |
| chr.2_SAT5      | (540) | TTCC | TGGATGCATTG  | TAGAG             | GTTTCTCAATC | TATTTT     | CACTGGAAA | ATTC    |          |
| chr.3_SAT5      | (681) | TTCC | TGGATGCATTG  | CAGAGA            | TTTCTCAATC  | CATTTT     | CACTGGAAA | GTTT    |          |
| Chr.4_SAT5      | (603) | TTCC | TGAATGCATTG  | CAGAGA            | TTTCTCAATC  | CATTTT     | TATTGG    | CAAATTC |          |
| Chr.5_SAT5      | (169) | TTCC | G            | GATGCATTG         | CAGAGA      | TTTCTCAATC | TATTTT    | CACAA   | GAAAATTT |
| AT2G18042       | (173) | TTCC | TGGATGCATTG  | TAGAG             | GTTTCTCAATC | TATTTT     | CACTGGAAA | ATTC    |          |
| AT3G42565       | (164) | TTCC | TGGATGCATTG  | CAGAGA            | TTTCTCAATC  | CATTTT     | CACTGGAAA | GTTT    |          |
| AT4G09545       | (173) | TTCC | TGAATGCATTG  | CAGAGA            | TTTCTCAATC  | CATTTT     | TATTGG    | CAAATTC |          |
| AT5G60978       | (161) | TTCC | G            | GATGCATTG         | CAGAGA      | TTTCTCAATC | TATTTT    | CACAA   | GAAAATTT |
| Consensus       | (701) | TTCC | TGGATGCATTGC | CAGAGATTTCTCAATCC | ATTTT       | CACTGGAAA  | ATTC      |         |          |

Section 16

|                 | (751) | 751   | 760       | 770     | 780 | 790     | 800       |           |        |          |          |      |    |     |
|-----------------|-------|-------|-----------|---------|-----|---------|-----------|-----------|--------|----------|----------|------|----|-----|
| ATSAT5Satellite | (726) | GGT   | AATTTAGGT | C       | CGG | CTTGTTG | CAAAGCATT | TTTGGA    | CGCCGA | ---TAA   |          |      |    |     |
| chr.2_SAT5      | (590) | GGC   | AATTTAGGT | C       | CA  | CTTGTTG | TAAAGCATT | GTTGGA    | CGCT   | GAAGTCAA |          |      |    |     |
| chr.3_SAT5      | (731) | GGT   | AATTTAGGT | C       | CGG | CTTGTTG | CAAAGCATT | TTTGGA    | TGCC   | AAAGTCAA |          |      |    |     |
| Chr.4_SAT5      | (653) | A     | GTAA      | TTAGGT  | T   | CT      | GCTTGTTG  | CAAAGCATT | TTTGGA | CGCT     | GAAGTCAA |      |    |     |
| Chr.5_SAT5      | (219) | GGT   | AA        | CTTAGGT | C   | CGG     | CTTGTTG   | CAAAGCATT | TTTGGA | T        | GT       | CGAA | TC | CAA |
| AT2G18042       | (223) | GGC   | AATTTAGGT | C       | CA  | CTTGTTG | TAAAGCATT | GTTGGA    | CGCT   | GAAGTCAA |          |      |    |     |
| AT3G42565       | (214) | GGT   | AATTTAGGT | C       | CGG | CTTGTTG | CAAAGCATT | TTTGGA    | TGCC   | AAAGTCAA |          |      |    |     |
| AT4G09545       | (223) | A     | GTAA      | TTAGGT  | T   | CT      | GCTTGTTG  | CAAAGCATT | TTTGGA | CGCT     | GAAGTCAA |      |    |     |
| AT5G60978       | (211) | GGT   | AA        | CTTAGGT | C   | CGG     | CTTGTTG   | CAAAGCATT | TTTGGA | T        | GT       | CGAA | TC | CAA |
| Consensus       | (751) | GGTAA | TTAGGT    | C       | CGG | CTTGTTG | CAAAGCATT | TTTGGA    | CGCCGA | GAAGTCAA |          |      |    |     |

Supplementary Figure 2. Sequence alignment

Section 17

|                 | (801) | 801  | 810  | 820 | 830        | 840         | 850    |     |               |
|-----------------|-------|------|------|-----|------------|-------------|--------|-----|---------------|
| ATSAT5Satellite | (773) | TTG  | CATA | CCG | AAAATTCCAT | TTCATTCCAT  | TTTTT  | TCC | CCGATGCTAAAG  |
| chr.2_SAT5      | (640) | TTC  | CATG | CCG | AAAATTCCAT | TTCATTCTGTT | TTTTT  | TCC | CCGATGCTAAAG  |
| chr.3_SAT5      | (781) | TTG  | CATA | CCG | AAAATTCCAT | TTCATTCCGTT | ATTTC  | TCC | CCGATGCTAAAG  |
| Chr.4_SAT5      | (703) | CTG  | CATA | CC  | AAAATTCCAC | TATTCCG     | CTTTTT | TCC | CCGATGCTAAAAG |
| Chr.5_SAT5      | (269) | TTG  | CATG | CC  | AAAATTCCAT | TTCATTCCGTT | ATTTC  | TCC | CCGATGCTAAAAG |
| AT2G18042       | (273) | TTG  | CATG | CCG | AAAATTCCAT | TTCATTCTGTT | TTTTT  | TCC | CCGATGCTAAAG  |
| AT3G42565       | (264) | TTG  | CATA | CCG | AAAATTCCAT | TTCATTCCGTT | ATTTC  | TCC | CCGATGCTAAAG  |
| AT4G09545       | (273) | CTG  | CATA | CC  | AAAATTCCAC | TATTCCG     | CTTTTT | TCC | CCGATGCTAAAAG |
| AT5G60978       | (261) | TTG  | CATG | CC  | AAAATTCCAT | TTCATTCCGTT | ATTTC  | TCC | CCGATGCTAAAAG |
| Consensus       | (801) | TTGC | CATA | CCG | AAAATTCCAT | TTCATTCCGTT | TTTTT  | TCC | CCGATGCTAAAG  |

Section 18

|                 | (851) | 851     | 860 | 870  | 880  | 890    | 900         |     |      |        |     |
|-----------------|-------|---------|-----|------|------|--------|-------------|-----|------|--------|-----|
| ATSAT5Satellite | (823) | AACAATG | TTC | AAGA | TTG  | CCGGTG | CAACTCCTCC  | CAT | ACCA | AAATAG | TGT |
| chr.2_SAT5      | (690) | AACAATG | CTC | AAGA | ATTG | TGGTG  | CAACTCCTCC  | TAT | ACCA | AAATAG | AGT |
| chr.3_SAT5      | (831) | AACAATG | TTC | AAGA | TTG  | CCGGTG | CAACTCCTCC  | CAT | ACCA | AAATAG | AGT |
| Chr.4_SAT5      | (753) | AACAATG | TTC | AAGA | ATTG | CCGGTG | TAACTCCTCC  | TAC | ACCG | AAATAG | AGT |
| Chr.5_SAT5      | (319) | AACAATG | TTC | AAGA | ATTG | CCGGTG | CTAACTCCTCC | TAC | ACCA | AAATAG | AGT |
| AT2G18042       | (323) | AACAATG | CTC | AAGA | ATTG | TGGTG  | CAACTCCTCC  | TAT | ACCA | AAATAG | --- |
| AT3G42565       | (314) | AACAATG | TTC | AAGA | TTG  | CCGGTG | CAACTCCTCC  | CAT | ACCA | AAATAG | --- |
| AT4G09545       | (323) | AACAATG | TTC | AAGA | ATTG | CCGGTG | TAACTCCTCC  | TAC | ACCG | AAATAG | --- |
| AT5G60978       | (311) | AACAATG | TTC | AAGA | ATTG | CCGGTG | CTAACTCCTCC | TAC | ACCA | AAATAG | --- |
| Consensus       | (851) | AACAATG | TTC | AAGA | ATTG | CCGGTG | CAACTCCTCC  | TAT | ACCA | AAATAG | AGT |

Section 19

|                 | (901) | 901   | 910      | 920    | 930      | 940       | 950       |           |          |       |         |         |       |
|-----------------|-------|-------|----------|--------|----------|-----------|-----------|-----------|----------|-------|---------|---------|-------|
| ATSAT5Satellite | (873) | TTTA  | TCTTATT  | -----  | TTTAA    | AATAGATAA | CTTTTT    | -----     | CAAC     |       |         |         |       |
| chr.2_SAT5      | (740) | TTTAG | CCTTAGT  | -T-    | -----    | TTAAAAAT  | CTATG     | ATTTTTTT  | TCTTTT   | CAAC  |         |         |       |
| chr.3_SAT5      | (881) | TTTA  | ACTTATT  | -----  | TTTAA    | AATAGATA  | GC        | TTTTTT    | -----    | CAAC  |         |         |       |
| Chr.4_SAT5      | (803) | TTTA  | AAATTATT | A      | TT       | -----     | TTTAA     | AATAGATA  | ATTTTTTT | ---   | TCCAAT  |         |       |
| Chr.5_SAT5      | (369) | C     | TTAG     | T      | TTATT    | T         | TTAAAACAT | A         | TAAAATA  | TGA   | ATTTTTT | GTCTTTT | CAAC  |
| AT2G18042       | (370) | ----- | -----    | -----  | -----    | -----     | -----     | -----     | -----    | ----- | -----   | -----   | ----- |
| AT3G42565       | (361) | ----- | -----    | -----  | -----    | -----     | -----     | -----     | -----    | ----- | -----   | -----   | ----- |
| AT4G09545       | (370) | ----- | -----    | -----  | -----    | -----     | -----     | -----     | -----    | ----- | -----   | -----   | ----- |
| AT5G60978       | (358) | ----- | -----    | -----  | -----    | -----     | -----     | -----     | -----    | ----- | -----   | -----   | ----- |
| Consensus       | (901) | TTTAG | CCTT     | ATTTTT | TAAAACAT | TTTAA     | AATAGATA  | AATTTTTTT | TCTTTT   | CAAC  |         |         |       |

Section 20

|                 | (951) | 951    | 960   | 970    | 980   | 990      | 1000      |           |          |           |        |           |       |       |       |
|-----------------|-------|--------|-------|--------|-------|----------|-----------|-----------|----------|-----------|--------|-----------|-------|-------|-------|
| ATSAT5Satellite | (908) | TTATTT | T     | TTT    | ----- | AAAATTTT | -AGCTTACG | T         | TACATGTT | TATAA     | TAA    | T         |       |       |       |
| chr.2_SAT5      | (782) | TTATTT | A     | TTT    | ----- | GAAATTT  | GT        | -AGCTTAC  | T        | TACATGTT  | TATACT | CCA       |       |       |       |
| chr.3_SAT5      | (916) | TTAT   | G     | TTT    | ----- | AAAATTTT | -AGCTT    | TAGT      | -ACATGTT | TATAA     | TAA    | T         |       |       |       |
| Chr.4_SAT5      | (844) | TTATTT | C     | TT     | ----- | ACAATTTT | -AGCTTACG | CTACATGTT | TATACT   | CCA       |        |           |       |       |       |
| Chr.5_SAT5      | (419) | TTCTTT | C     | TT     | A     | AATTTTA  | T         | AATT      | CTCAGA   | TTAC      | T      | CAACATGTT | T     | TACT  | TAA   |
| AT2G18042       | (370) | -----  | ----- | -----  | ----- | -----    | -----     | -----     | -----    | -----     | -----  | -----     | ----- | ----- | ----- |
| AT3G42565       | (361) | -----  | ----- | -----  | ----- | -----    | -----     | -----     | -----    | -----     | -----  | -----     | ----- | ----- | ----- |
| AT4G09545       | (370) | -----  | ----- | -----  | ----- | -----    | -----     | -----     | -----    | -----     | -----  | -----     | ----- | ----- | ----- |
| AT5G60978       | (358) | -----  | ----- | -----  | ----- | -----    | -----     | -----     | -----    | -----     | -----  | -----     | ----- | ----- | ----- |
| Consensus       | (951) | TTATTT | TT    | AATTTT | T     | AATT     | CTCAGA    | TTAC      | T        | CAACATGTT | T      | TACT      | TAA   |       |       |

Supplementary Figure 2. Sequence alignment

Section 21

|                 | (1001) | 1001                                              | 1010    | 1020  | 1030    | 1040                     | 1050                          |
|-----------------|--------|---------------------------------------------------|---------|-------|---------|--------------------------|-------------------------------|
| ATSAT5Satellite | (951)  | AA                                                | TTAAAAA | AGA   | GATA    | TAGTAATAACATTTGAGAAGTTGC | ATTTG                         |
| chr.2_SAT5      | (824)  | AAAA                                              | GAAAAAA | -AC   | GATGATA | CAATAATAACAT             | -----AGTTGTATTTG              |
| chr.3_SAT5      | (957)  | AA                                                | TTAAAAA | ----  | GAT     | TATA                     | TAGTAATAACATTTGAGAATTTGCATTTG |
| Chr.4_SAT5      | (886)  | AAAAAA                                            | TATC    | ----- | ATATA   | AAGTAAA                  | AACATTTGAGAAGTTGTATTTG        |
| Chr.5_SAT5      | (469)  | AAAAAA                                            | CGA     | ----- | TGATA   | CATTAATAACATTTGAGAAGT    | CGTATTTG                      |
| AT2G18042       | (370)  | -----                                             | -----   | ----- | -----   | -----                    | -----                         |
| AT3G42565       | (361)  | -----                                             | -----   | ----- | -----   | -----                    | -----                         |
| AT4G09545       | (370)  | -----                                             | -----   | ----- | -----   | -----                    | -----                         |
| AT5G60978       | (358)  | -----                                             | -----   | ----- | -----   | -----                    | -----                         |
| Consensus       | (1001) | AAAAAAAAAAGACGATGATATAGTAATAACATTTGAGAAGTTGTATTTG |         |       |         |                          |                               |

Section 22

|                 | (1051) | 1051                                               | 1060        | 1070               | 1080            | 1090  | 1100                      |
|-----------------|--------|----------------------------------------------------|-------------|--------------------|-----------------|-------|---------------------------|
| ATSAT5Satellite | (1001) | GGTTC                                              | CATGTTTA    | TA                 | CATTCTTCA       | C     | TTCTAATGAATAACACCTTGAAACA |
| chr.2_SAT5      | (867)  | GGTTCAAT                                           | ACTTACTCATT | T                  | TTCAATT         | A     | TAATGAATAACACCTTGAAACA    |
| chr.3_SAT5      | (1003) | GGTTCAAT                                           | GTC         | TACTCATTCTT        | T               | AA    | TCTAATGAATAACACCTTGAAACA  |
| Chr.4_SAT5      | (930)  | GGTTCAAT                                           | A           | TTTACTCATTCTTCAATT | TCTAATGAATAACAG | C     | TTTGAAACA                 |
| Chr.5_SAT5      | (513)  | TGTT                                               | TAA         | TTTTA              | GTC             | G     | TTCTTATTTCTAATGAATAA      |
| AT2G18042       | (370)  | -----                                              | -----       | -----              | -----           | ----- | -----                     |
| AT3G42565       | (361)  | -----                                              | -----       | -----              | -----           | ----- | -----                     |
| AT4G09545       | (370)  | -----                                              | -----       | -----              | -----           | ----- | -----                     |
| AT5G60978       | (358)  | -----                                              | -----       | -----              | -----           | ----- | -----                     |
| Consensus       | (1051) | GGTTCAATGTTTACTCATTCTTCAATTCTAATGAATAACACCTTGAAACA |             |                    |                 |       |                           |

Section 23

|                 | (1101) | 1101                                                | 1110                       | 1120  | 1130        | 1140  | 1150                       |
|-----------------|--------|-----------------------------------------------------|----------------------------|-------|-------------|-------|----------------------------|
| ATSAT5Satellite | (1051) | TCGAGTCCATAA                                        | TGAATTTAGTCTTACAATGTTACAGA | CC    | TTCAAATTG   |       |                            |
| chr.2_SAT5      | (917)  | T                                                   | TAACTCCGTAATT              | -     | AATTTAGTCTT | GCAAT | -----                      |
| chr.3_SAT5      | (1053) | TCGAG                                               | CCCATAAT                   | ----  | G           | ----- | TTACAATGTTACAGAATTTCAAATTG |
| Chr.4_SAT5      | (980)  | TCGAT                                               | TCTATAAAT                  | -     | AACTTT      | T     | GTCTTACAATGTT              |
| Chr.5_SAT5      | (563)  | TCGAGT                                              | AGATAAAT                   | -     | AATTTA      | A     | TGCAATATT                  |
| AT2G18042       | (370)  | -----                                               | -----                      | ----- | -----       | ----- | -----                      |
| AT3G42565       | (361)  | -----                                               | -----                      | ----- | -----       | ----- | -----                      |
| AT4G09545       | (370)  | -----                                               | -----                      | ----- | -----       | ----- | -----                      |
| AT5G60978       | (358)  | -----                                               | -----                      | ----- | -----       | ----- | -----                      |
| Consensus       | (1101) | TCGAGTCCATAAATGAAATTTAGTCTTACAATGTTACAGAATTTCAAATTG |                            |       |             |       |                            |

Section 24

|                 | (1151) | 1151                                               | 1160                     | 1170  | 1180              | 1190  | 1200                  |
|-----------------|--------|----------------------------------------------------|--------------------------|-------|-------------------|-------|-----------------------|
| ATSAT5Satellite | (1101) | TTT                                                | CATAAATCTTTGAAATATGTCATA | ----- | ACACAAAATCTGAGAGT |       |                       |
| chr.2_SAT5      | (947)  | -----                                              | -----                    | ----- | -----             | ----- | -----                 |
| chr.3_SAT5      | (1093) | TTTT                                               | CATAAATCTTTGAAATATGTCATA | ----- | ACACAAAATCTGAGAAT |       |                       |
| Chr.4_SAT5      | (1013) | -----                                              | -----                    | ----- | -----             | ----- | -----                 |
| Chr.5_SAT5      | (609)  | TTTT                                               | CATAAATCTTT              | T     | AGATAC            | G     | TATAGTAACACAAAATCTGTC |
| AT2G18042       | (370)  | -----                                              | -----                    | ----- | -----             | ----- | -----                 |
| AT3G42565       | (361)  | -----                                              | -----                    | ----- | -----             | ----- | -----                 |
| AT4G09545       | (370)  | -----                                              | -----                    | ----- | -----             | ----- | -----                 |
| AT5G60978       | (358)  | -----                                              | -----                    | ----- | -----             | ----- | -----                 |
| Consensus       | (1151) | TTTTCATAAATCTTTGAAATATGTCATATAGTAACACAAAATCTGAGAAT |                          |       |                   |       |                       |

Supplementary Figure 2. Sequence alignment

|                 |        | Section 25                                          |      |      |      |      |      |
|-----------------|--------|-----------------------------------------------------|------|------|------|------|------|
|                 | (1201) | 1201                                                | 1210 | 1220 | 1230 | 1240 | 1250 |
| ATSAT5Satellite | (1146) | GGTTTATAATTTTATTAGATAAGACTCGTCTCAAATATGCTGGTGTGAGAA |      |      |      |      |      |
| chr.2_SAT5      | (947)  | -----                                               |      |      |      |      |      |
| chr.3_SAT5      | (1138) | GGTTTATAATTTTATTAGATAAGACTCGTCTAA-TAGGCGGGTGTGAGAA  |      |      |      |      |      |
| Chr.4_SAT5      | (1013) | -----                                               |      |      |      |      |      |
| Chr.5_SAT5      | (659)  | GGTTTATAA CTTT -TTA TATA C GAC -                    |      |      |      |      |      |
| AT2G18042       | (370)  | -----                                               |      |      |      |      |      |
| AT3G42565       | (361)  | -----                                               |      |      |      |      |      |
| AT4G09545       | (370)  | -----                                               |      |      |      |      |      |
| AT5G60978       | (358)  | -----                                               |      |      |      |      |      |
| Consensus       | (1201) | GGTTTATAATTTTATTAGATAAGACTCGTCTAAATATGCTGGTGTGAGAA  |      |      |      |      |      |
|                 |        | Section 26                                          |      |      |      |      |      |
|                 | (1251) | 1251                                                | 1260 | 1270 | 1280 | 1290 | 1300 |
| ATSAT5Satellite | (1196) | ATGTTGTGATGATATAAAAATTCTAAATAGTAATCTGTATTTTCAAAG    |      |      |      |      |      |
| chr.2_SAT5      | (947)  | -----                                               |      |      |      |      |      |
| chr.3_SAT5      | (1187) | ATGTTGTGATGATATAAAAATTCTAAATAGTAATCTGTATTTT-CAAAG   |      |      |      |      |      |
| Chr.4_SAT5      | (1013) | -----                                               |      |      |      |      |      |
| Chr.5_SAT5      | (683)  | -----                                               |      |      |      |      |      |
| AT2G18042       | (370)  | -----                                               |      |      |      |      |      |
| AT3G42565       | (361)  | -----                                               |      |      |      |      |      |
| AT4G09545       | (370)  | -----                                               |      |      |      |      |      |
| AT5G60978       | (358)  | -----                                               |      |      |      |      |      |
| Consensus       | (1251) | ATGTTGTGATGATATAAAAATTCTAAATAGTAATCTGTATTTTCAAAG    |      |      |      |      |      |
|                 |        | Section 27                                          |      |      |      |      |      |
|                 | (1301) | 1301                                                | 1310 | 1320 | 1330 | 1340 | 1350 |
| ATSAT5Satellite | (1246) | AATATTTCAATTATATACATTCATATACCATGCCTTTACTAATTATATA   |      |      |      |      |      |
| chr.2_SAT5      | (947)  | -----                                               |      |      |      |      |      |
| chr.3_SAT5      | (1236) | AATATTTCAATTATATACATTCATATACCATGCATTTTCTAATTATATA   |      |      |      |      |      |
| Chr.4_SAT5      | (1013) | -----                                               |      |      |      |      |      |
| Chr.5_SAT5      | (683)  | -----                                               |      |      |      |      |      |
| AT2G18042       | (370)  | -----                                               |      |      |      |      |      |
| AT3G42565       | (361)  | -----                                               |      |      |      |      |      |
| AT4G09545       | (370)  | -----                                               |      |      |      |      |      |
| AT5G60978       | (358)  | -----                                               |      |      |      |      |      |
| Consensus       | (1301) | AATATTTCAATTATATACATTCATATACCATGCCTTTTCTAATTATATA   |      |      |      |      |      |
|                 |        | Section 28                                          |      |      |      |      |      |
|                 | (1351) | 1351                                                | 1360 | 1370 | 1380 | 1390 | 1400 |
| ATSAT5Satellite | (1296) | TAATACGGGATTTCTCAAAGTATAAAGAAAGATAAGACAAGGAAAACAT   |      |      |      |      |      |
| chr.2_SAT5      | (947)  | -----                                               |      |      |      |      |      |
| chr.3_SAT5      | (1286) | TTATACGGGATTCCTCAAAGCATAACACAAAGATAAGACAAGGAAAACAT  |      |      |      |      |      |
| Chr.4_SAT5      | (1013) | -----                                               |      |      |      |      |      |
| Chr.5_SAT5      | (683)  | -----                                               |      |      |      |      |      |
| AT2G18042       | (370)  | -----                                               |      |      |      |      |      |
| AT3G42565       | (361)  | -----                                               |      |      |      |      |      |
| AT4G09545       | (370)  | -----                                               |      |      |      |      |      |
| AT5G60978       | (358)  | -----                                               |      |      |      |      |      |
| Consensus       | (1351) | TTATACGGGATTTCTCAAAGTATAACAGAAAGATAAGACAAGGAAAACAT  |      |      |      |      |      |

Supplementary Figure 2. Sequence alignment

Section 29

|                        | (1401) | 1401                                               | 1410  | 1420            | 1430      | 1440                      | 1450  |
|------------------------|--------|----------------------------------------------------|-------|-----------------|-----------|---------------------------|-------|
| ATSAT5Satellite (1346) |        | ACAACA                                             | CTA   | TAAAA           | GACGCACCA | GACAGAGCCTCTCACTGAATTTTGT |       |
| chr.2_SAT5 (947)       |        | -----                                              | ----- | -----           | -----     | -----                     | ----- |
| chr.3_SAT5 (1336)      |        | ACAACA                                             | GCT   | TAAAAAGACGCACCA | A         | ACAGAGCCTCTCACTGAATTTTGT  |       |
| Chr.4_SAT5 (1013)      |        | -----                                              | ----- | -----           | -----     | -----                     | ----- |
| Chr.5_SAT5 (683)       |        | -----                                              | ----- | -----           | -----     | -----                     | ----- |
| AT2G18042 (370)        |        | -----                                              | ----- | -----           | -----     | -----                     | ----- |
| AT3G42565 (361)        |        | -----                                              | ----- | -----           | -----     | -----                     | ----- |
| AT4G09545 (370)        |        | -----                                              | ----- | -----           | -----     | -----                     | ----- |
| AT5G60978 (358)        |        | -----                                              | ----- | -----           | -----     | -----                     | ----- |
| Consensus (1401)       |        | ACAACATCTTTAAAAAGACGCACCAGACAGAGCCTCTCACTGAATTTTGT |       |                 |           |                           |       |

Section 30

|                        | (1451) | 1451                                               | 1460  | 1470   | 1480             | 1490  | 1500            |
|------------------------|--------|----------------------------------------------------|-------|--------|------------------|-------|-----------------|
| ATSAT5Satellite (1395) |        | GGTAAACGAAT                                        | A     | GAACTC | TGTAATTGAGAAAAAA | A     | TAAATGAAATAATAT |
| chr.2_SAT5 (947)       |        | -----                                              | ----- | -----  | -----            | ----- | -----           |
| chr.3_SAT5 (1386)      |        | GGTAAACGAAT                                        | T     | GAACTC | CGTAATTGAGAAAAAA | T     | GAAATGAAATAA    |
| Chr.4_SAT5 (1013)      |        | -----                                              | ----- | -----  | -----            | ----- | -----           |
| Chr.5_SAT5 (683)       |        | -----                                              | ----- | -----  | -----            | ----- | -----           |
| AT2G18042 (370)        |        | -----                                              | ----- | -----  | -----            | ----- | -----           |
| AT3G42565 (361)        |        | -----                                              | ----- | -----  | -----            | ----- | -----           |
| AT4G09545 (370)        |        | -----                                              | ----- | -----  | -----            | ----- | -----           |
| AT5G60978 (358)        |        | -----                                              | ----- | -----  | -----            | ----- | -----           |
| Consensus (1451)       |        | GGTAAACGAATTGAACTCTGTAATTGAGAAAAAATTAAATGAAATAATAT |       |        |                  |       |                 |

Section 31

|                        | (1501) | 1501                                                | 1510  | 1520                                  | 1530  | 1540  | 1550  |
|------------------------|--------|-----------------------------------------------------|-------|---------------------------------------|-------|-------|-------|
| ATSAT5Satellite (1445) |        | TAAGAAATAAAA                                        | A     | GAGAGACATATTTAAGTTACAAAATTAGAAAATATTA |       |       |       |
| chr.2_SAT5 (947)       |        | -----                                               | ----- | -----                                 | ----- | ----- | ----- |
| chr.3_SAT5 (1436)      |        | TAAGAAATAAAA                                        | G     | GAGAGACATATTTAAGTTACAAAATTAGAAAATATTA |       |       |       |
| Chr.4_SAT5 (1013)      |        | -----                                               | ----- | -----                                 | ----- | ----- | ----- |
| Chr.5_SAT5 (683)       |        | -----                                               | ----- | -----                                 | ----- | ----- | ----- |
| AT2G18042 (370)        |        | -----                                               | ----- | -----                                 | ----- | ----- | ----- |
| AT3G42565 (361)        |        | -----                                               | ----- | -----                                 | ----- | ----- | ----- |
| AT4G09545 (370)        |        | -----                                               | ----- | -----                                 | ----- | ----- | ----- |
| AT5G60978 (358)        |        | -----                                               | ----- | -----                                 | ----- | ----- | ----- |
| Consensus (1501)       |        | TAAGAAATAAAAAGGAGAGACATATTTAAGTTACAAAATTAGAAAATATTA |       |                                       |       |       |       |

Section 32

|                        | (1551) | 1551                                    | 1560                               | 1570        | 1580  | 1590  | 1600        |
|------------------------|--------|-----------------------------------------|------------------------------------|-------------|-------|-------|-------------|
| ATSAT5Satellite (1495) |        | AATCA                                   | CGTATTAATATTTTTCTAAAACAAAATAGGGAAC | TTTTACTTCTG |       |       |             |
| chr.2_SAT5 (947)       |        | -----                                   | -----                              | -----       | ----- | ----- | -----       |
| chr.3_SAT5 (1486)      |        | AATCA                                   | AGTATTAATATTTTTCTAAAACAAAATAGGGAAC | TTTTACTTCTG |       |       |             |
| Chr.4_SAT5 (1013)      |        | -----                                   | -----                              | -----       | ----- | ----- | -----       |
| Chr.5_SAT5 (683)       |        | -----                                   | -----                              | -----       | ----- | ----- | -----       |
| AT2G18042 (370)        |        | -----                                   | -----                              | -----       | ----- | ----- | -----       |
| AT3G42565 (361)        |        | -----                                   | -----                              | -----       | ----- | ----- | -----       |
| AT4G09545 (370)        |        | -----                                   | -----                              | -----       | ----- | ----- | -----       |
| AT5G60978 (358)        |        | -----                                   | -----                              | -----       | ----- | ----- | -----       |
| Consensus (1551)       |        | AATCACGTATTAATATTTTTCTAAAACAAAATAGGGAAC |                                    |             |       |       | TTTTACTTCTG |



Supplementary Figure 2. Sequence alignment

Section 33

|                        | (1601) | 1601                | 1610                     | 1620                   | 1630  | 1640     | 1650  |
|------------------------|--------|---------------------|--------------------------|------------------------|-------|----------|-------|
| ATSAT5Satellite (1545) |        | TTTTGAATATATAAACGAT | TT                       | TTTAATAGAAATTTGTTCAATA | T     | TTTAATAT |       |
| chr.2_SAT5 (947)       |        | -----               | -----                    | -----                  | ----- | -----    | ----- |
| chr.3_SAT5 (1536)      |        | TTTTGAATATATAAACGAC | CA                       | TTTAATAGAAATTTGTTCAATA | G     | TTTAATAT |       |
| Chr.4_SAT5 (1013)      |        | -----               | -----                    | -----                  | ----- | -----    | ----- |
| Chr.5_SAT5 (683)       |        | -----               | -----                    | -----                  | ----- | -----    | ----- |
| AT2G18042 (370)        |        | -----               | -----                    | -----                  | ----- | -----    | ----- |
| AT3G42565 (361)        |        | -----               | -----                    | -----                  | ----- | -----    | ----- |
| AT4G09545 (370)        |        | -----               | -----                    | -----                  | ----- | -----    | ----- |
| AT5G60978 (358)        |        | -----               | -----                    | -----                  | ----- | -----    | ----- |
| Consensus (1601)       |        | TTTTGAATATATAAACGAT | TTTTTAATAGAAATTTGTTCAATA | TTTTTAATAT             |       |          |       |

Section 34

|                        | (1651) | 1651          | 1660                            | 1670    | 1680          | 1690  | 1700                       |       |
|------------------------|--------|---------------|---------------------------------|---------|---------------|-------|----------------------------|-------|
| ATSAT5Satellite (1595) |        | AGTAAATAAAA   | A                               | AATTTGT | TATATATGAACTA | --    | TTTTTTTTACTTG              | TGTAT |
| chr.2_SAT5 (947)       |        | -----         | -----                           | -----   | -----         | ----- | -----                      | ----- |
| chr.3_SAT5 (1586)      |        | AT            | TAAATAAAA                       | C       | AATTTG        | A     | ATATATGAACTAACTTTTTTTACTTA | TGTAT |
| Chr.4_SAT5 (1013)      |        | -----         | -----                           | -----   | -----         | ----- | -----                      | ----- |
| Chr.5_SAT5 (683)       |        | -----         | -----                           | -----   | -----         | ----- | -----                      | ----- |
| AT2G18042 (370)        |        | -----         | -----                           | -----   | -----         | ----- | -----                      | ----- |
| AT3G42565 (361)        |        | -----         | -----                           | -----   | -----         | ----- | -----                      | ----- |
| AT4G09545 (370)        |        | -----         | -----                           | -----   | -----         | ----- | -----                      | ----- |
| AT5G60978 (358)        |        | -----         | -----                           | -----   | -----         | ----- | -----                      | ----- |
| Consensus (1651)       |        | ATTAAATAAACAA | TTTTGTATATATGAACTAACTTTTTTTACTT | TGTGTAT |               |       |                            |       |

Section 35

|                        | (1701) | 1701                                  | 1710    | 1720   | 1730  | 1740  | 1750    |
|------------------------|--------|---------------------------------------|---------|--------|-------|-------|---------|
| ATSAT5Satellite (1643) |        | ATATCCGATGGGGTTATGAAATTTTTCTATATTTTGT | TTTTTAA | AAATAT |       |       |         |
| chr.2_SAT5 (947)       |        | -----                                 | -----   | -----  | ----- | ----- | -----   |
| chr.3_SAT5 (1636)      |        | ATATCCGATGGGGTTATGAAATTTTTCTAT        | --      | TTTGT  | TTT   | --    | AAAATAT |
| Chr.4_SAT5 (1013)      |        | -----                                 | -----   | -----  | ----- | ----- | -----   |
| Chr.5_SAT5 (683)       |        | -----                                 | -----   | -----  | ----- | ----- | -----   |
| AT2G18042 (370)        |        | -----                                 | -----   | -----  | ----- | ----- | -----   |
| AT3G42565 (361)        |        | -----                                 | -----   | -----  | ----- | ----- | -----   |
| AT4G09545 (370)        |        | -----                                 | -----   | -----  | ----- | ----- | -----   |
| AT5G60978 (358)        |        | -----                                 | -----   | -----  | ----- | ----- | -----   |
| Consensus (1701)       |        | ATATCCGATGGGGTTATGAAATTTTTCTATATTTTGT | TTTTTAA | AAATAT |       |       |         |

Section 36

|                        | (1751) | 1751                               | 1760                           | 1770                          | 1780           | 1790  | 1800  |
|------------------------|--------|------------------------------------|--------------------------------|-------------------------------|----------------|-------|-------|
| ATSAT5Satellite (1693) |        | AGG                                | TTTTGTGCAAAACACCCATCTAACTCATCT | AG                            | TTTTGCAATTTTAC |       |       |
| chr.2_SAT5 (947)       |        | -----                              | -----                          | -----                         | -----          | ----- | ----- |
| chr.3_SAT5 (1682)      |        | AGG                                | A                              | TTTTGTGCAAAACACCCATCTAACTCATC | C              | T     | A     |
| Chr.4_SAT5 (1013)      |        | -----                              | -----                          | -----                         | -----          | ----- | ----- |
| Chr.5_SAT5 (683)       |        | -----                              | -----                          | -----                         | -----          | ----- | ----- |
| AT2G18042 (370)        |        | -----                              | -----                          | -----                         | -----          | ----- | ----- |
| AT3G42565 (361)        |        | -----                              | -----                          | -----                         | -----          | ----- | ----- |
| AT4G09545 (370)        |        | -----                              | -----                          | -----                         | -----          | ----- | ----- |
| AT5G60978 (358)        |        | -----                              | -----                          | -----                         | -----          | ----- | ----- |
| Consensus (1751)       |        | AGGGTTTTGTGCAAAACACCCATCTAACTCATCT | TGTTTTGCAATTTTAC               |                               |                |       |       |

Supplementary Figure 2. Sequence alignment

Section 37

|                        | (1801) | 1801                 | 1810                  | 1820        | 1830                | 1840    | 1850    |
|------------------------|--------|----------------------|-----------------------|-------------|---------------------|---------|---------|
| ATSAT5Satellite (1743) |        | CCTA                 | TATCTCTAACAAA         | CA          | CATATTAATCTTATGAAGT | CTAAAAA | TAAATAC |
| chr.2_SAT5 (947)       |        | -----                | -----                 | -----       | -----               | -----   | -----   |
| chr.3_SAT5 (1732)      |        | CTTC                 | TATCTCTAACAAA         | TGC         | CATATTAATCTTATGAAG  | A       | CTAAAAA |
| Chr.4_SAT5 (1013)      |        | -----                | -----                 | -----       | -----               | -----   | -----   |
| Chr.5_SAT5 (683)       |        | -----                | -----                 | -----       | -----               | -----   | -----   |
| AT2G18042 (370)        |        | -----                | -----                 | -----       | -----               | -----   | -----   |
| AT3G42565 (361)        |        | -----                | -----                 | -----       | -----               | -----   | -----   |
| AT4G09545 (370)        |        | -----                | -----                 | -----       | -----               | -----   | -----   |
| AT5G60978 (358)        |        | -----                | -----                 | -----       | -----               | -----   | -----   |
| Consensus (1801)       |        | CTTCTATCTCTAACAAATGC | CATATTAATCTTATGAAGTCT | AAAAATAATAC |                     |         |         |

Section 38

|                        | (1851) | 1851  | 1860            | 1870  | 1880      | 1890             | 1900                  |
|------------------------|--------|-------|-----------------|-------|-----------|------------------|-----------------------|
| ATSAT5Satellite (1793) |        | GCA   | AATATGACCCTTATA | C     | GTATAT    | TGTAAA           | CTTTTTTACACTCCATAGA   |
| chr.2_SAT5 (947)       |        | ----- | -----           | ----- | -----     | -----            | -----                 |
| chr.3_SAT5 (1782)      |        | GTA   | AATATGACCCTTATA | TGT   | TATATA    | GTA              | AACTTTTTTACACTCCATAGA |
| Chr.4_SAT5 (1013)      |        | ----- | -----           | ----- | -----     | -----            | -----                 |
| Chr.5_SAT5 (683)       |        | ----- | -----           | ----- | -----     | -----            | -----                 |
| AT2G18042 (370)        |        | ----- | -----           | ----- | -----     | -----            | -----                 |
| AT3G42565 (361)        |        | ----- | -----           | ----- | -----     | -----            | -----                 |
| AT4G09545 (370)        |        | ----- | -----           | ----- | -----     | -----            | -----                 |
| AT5G60978 (358)        |        | ----- | -----           | ----- | -----     | -----            | -----                 |
| Consensus (1851)       |        | GTA   | AATATGACCCTTATA | TGT   | TATATTGTA | AACTTTTTTACACTCC | ATAGA                 |

Section 39

|                        | (1901) | 1901  | 1910    | 1920     | 1930  | 1940           | 1950          |
|------------------------|--------|-------|---------|----------|-------|----------------|---------------|
| ATSAT5Satellite (1843) |        | TTAG  | ATTTTAA | TATTT    | C     | GAA            | GGT           |
| chr.2_SAT5 (947)       |        | ----- | -----   | -----    | ----- | -----          | -----         |
| chr.3_SAT5 (1832)      |        | TTAG  | ATTTTAA | A        | ATTT  | TGTT           | GGT           |
| Chr.4_SAT5 (1013)      |        | ----- | -----   | -----    | ----- | -----          | -----         |
| Chr.5_SAT5 (683)       |        | ----- | -----   | -----    | ----- | -----          | -----         |
| AT2G18042 (370)        |        | ----- | -----   | -----    | ----- | -----          | -----         |
| AT3G42565 (361)        |        | ----- | -----   | -----    | ----- | -----          | -----         |
| AT4G09545 (370)        |        | ----- | -----   | -----    | ----- | -----          | -----         |
| AT5G60978 (358)        |        | ----- | -----   | -----    | ----- | -----          | -----         |
| Consensus (1901)       |        | TTAG  | ATTTTAA | TATTTGTT | GGT   | CGATTTGAAGTTTT | TCGTTGCGAGGGC |

Section 40

|                        | (1951) | 1951  | 1960  | 1970  | 1980        | 1990      | 2000                |
|------------------------|--------|-------|-------|-------|-------------|-----------|---------------------|
| ATSAT5Satellite (1893) |        | TT    | CGATT | AAC   | CATATTA     | A         | ATATCAATAT          |
| chr.2_SAT5 (947)       |        | ----- | ----- | ----- | -----       | -----     | -----               |
| chr.3_SAT5 (1882)      |        | TT    | C     | AATTT | AAC         | CATATTA   | TATATCAATAT         |
| Chr.4_SAT5 (1013)      |        | ----- | ----- | ----- | -----       | -----     | -----               |
| Chr.5_SAT5 (683)       |        | ----- | ----- | ----- | -----       | -----     | -----               |
| AT2G18042 (370)        |        | ----- | ----- | ----- | -----       | -----     | -----               |
| AT3G42565 (361)        |        | ----- | ----- | ----- | -----       | -----     | -----               |
| AT4G09545 (370)        |        | ----- | ----- | ----- | -----       | -----     | -----               |
| AT5G60978 (358)        |        | ----- | ----- | ----- | -----       | -----     | -----               |
| Consensus (1951)       |        | TT    | CGATT | TAA   | CATATTTATAT | CAATATTTT | TACAACTTTTGTGGTAGCA |

Supplementary Figure 2. Sequence alignment

Section 41

|                        | (2001) | 2001         | 2010       | 2020                  | 2030  | 2040                  | 2050  |
|------------------------|--------|--------------|------------|-----------------------|-------|-----------------------|-------|
| ATSAT5Satellite (1943) |        | AAA --       | TGACGAA    | AGGGTTA               | CAT   | TGCGTATTATTTTAGACTTCA | T     |
| chr.2_SAT5 (947)       |        | -----        | -----      | -----                 | ----- | -----                 | ----- |
| chr.3_SAT5 (1932)      |        | AAAATTGACGAA | GAA        | GGTTG                 | CAATG | GGTATTATTTTAGACTT     | CGTA  |
| Chr.4_SAT5 (1013)      |        | -----        | -----      | -----                 | ----- | -----                 | ----- |
| Chr.5_SAT5 (683)       |        | -----        | -----      | -----                 | ----- | -----                 | ----- |
| AT2G18042 (370)        |        | -----        | -----      | -----                 | ----- | -----                 | ----- |
| AT3G42565 (361)        |        | -----        | -----      | -----                 | ----- | -----                 | ----- |
| AT4G09545 (370)        |        | -----        | -----      | -----                 | ----- | -----                 | ----- |
| AT5G60978 (358)        |        | -----        | -----      | -----                 | ----- | -----                 | ----- |
| Consensus (2001)       |        | AAAATTGACGAA | GAGGGGTTGC | ATTGGGTATTATTTTAGACTT | CGT   | CGGA                  |       |

Section 42

|                        | (2051) | 2051       | 2060             | 2070         | 2080               | 2090               | 2100               |
|------------------------|--------|------------|------------------|--------------|--------------------|--------------------|--------------------|
| ATSAT5Satellite (1991) |        | TAATTATGCA | TTT              | TTGGAGGTGGAG | AATAAA             | GATGCAAAAATAGATGAG |                    |
| chr.2_SAT5 (947)       |        | -----      | -----            | -----        | -----              | -----              | -----              |
| chr.3_SAT5 (1982)      |        | TAAT -     | ATGCA            | TTG          | TTGGAGGTGGAG       | GATAAA             | TATGCAAAAATAGATGAG |
| Chr.4_SAT5 (1013)      |        | -----      | -----            | -----        | -----              | -----              | -----              |
| Chr.5_SAT5 (683)       |        | -----      | -----            | -----        | -----              | -----              | -----              |
| AT2G18042 (370)        |        | -----      | -----            | -----        | -----              | -----              | -----              |
| AT3G42565 (361)        |        | -----      | -----            | -----        | -----              | -----              | -----              |
| AT4G09545 (370)        |        | -----      | -----            | -----        | -----              | -----              | -----              |
| AT5G60978 (358)        |        | -----      | -----            | -----        | -----              | -----              | -----              |
| Consensus (2051)       |        | TAATTATGCA | TTTTTTGGAGGTGGAG | GATAAA       | TATGCAAAAATAGATGAG |                    |                    |

Section 43

|                        | (2101) | 2101                                               | 2110  | 2120        | 2130            | 2140            | 2150        |
|------------------------|--------|----------------------------------------------------|-------|-------------|-----------------|-----------------|-------------|
| ATSAT5Satellite (2041) |        | TTAGAGG                                            | GTTTT | AT -        | TTGCACA         | AACCCTAAAAATAAC | AAAATTTGATT |
| chr.2_SAT5 (947)       |        | -----                                              | ----- | -----       | -----           | -----           | -----       |
| chr.3_SAT5 (2031)      |        | TTAGAGA                                            | GTTTT | TCTTTGCACAT | AACCCTAAAAATAAC | GAAATT -        | GATT        |
| Chr.4_SAT5 (1013)      |        | -----                                              | ----- | -----       | -----           | -----           | -----       |
| Chr.5_SAT5 (683)       |        | -----                                              | ----- | -----       | -----           | -----           | -----       |
| AT2G18042 (370)        |        | -----                                              | ----- | -----       | -----           | -----           | -----       |
| AT3G42565 (361)        |        | -----                                              | ----- | -----       | -----           | -----           | -----       |
| AT4G09545 (370)        |        | -----                                              | ----- | -----       | -----           | -----           | -----       |
| AT5G60978 (358)        |        | -----                                              | ----- | -----       | -----           | -----           | -----       |
| Consensus (2101)       |        | TTAGAGGGTTTTTTCTTTGCACATAACCCTAAAAATAACGAAATTTGATT |       |             |                 |                 |             |

Section 44

|                        | (2151) | 2151                                                | 2160  | 2170    | 2180  | 2190        | 2200                   |
|------------------------|--------|-----------------------------------------------------|-------|---------|-------|-------------|------------------------|
| ATSAT5Satellite (2090) |        | TGATA                                               | AGG   | GTGGATA | TTT   | CACTAATAAA  | TTTGACACGTGTCATGATCAG  |
| chr.2_SAT5 (947)       |        | -----                                               | ----- | -----   | ----- | -----       | -----                  |
| chr.3_SAT5 (2080)      |        | TGATA                                               | TGT   | GTGGATA | AC    | TCACTAATAAA | TTTGACACGTGTCATGATCAGG |
| Chr.4_SAT5 (1013)      |        | -----                                               | ----- | -----   | ----- | -----       | -----                  |
| Chr.5_SAT5 (683)       |        | -----                                               | ----- | -----   | ----- | -----       | -----                  |
| AT2G18042 (370)        |        | -----                                               | ----- | -----   | ----- | -----       | -----                  |
| AT3G42565 (361)        |        | -----                                               | ----- | -----   | ----- | -----       | -----                  |
| AT4G09545 (370)        |        | -----                                               | ----- | -----   | ----- | -----       | -----                  |
| AT5G60978 (358)        |        | -----                                               | ----- | -----   | ----- | -----       | -----                  |
| Consensus (2151)       |        | TGATATGTGTGGATATTTCACTAATAAATTTTGACACGTGTCATGATCAGG |       |         |       |             |                        |

Supplementary Figure 2. Sequence alignment

Section 45

|                        | (2201) | 2201            | 2210    | 2220    | 2230  | 2240          | 2250         |
|------------------------|--------|-----------------|---------|---------|-------|---------------|--------------|
| ATSAT5Satellite (2140) |        | TGAGTTAACAATTTT | GAAAGCC | CAACTTT | ATGTA | ---           | GATATTTGGCAC |
| chr.2_SAT5 (947)       |        | -----           | -----   | -----   | ----- | -----         | -----        |
| chr.3_SAT5 (2130)      |        | TGAGTTAACAATTTT | GAAAGCT | CAACTTT | GTA   | TATTAAGATATTT | GGCA-        |
| Chr.4_SAT5 (1013)      |        | -----           | -----   | -----   | ----- | -----         | -----        |
| Chr.5_SAT5 (683)       |        | -----           | -----   | -----   | ----- | -----         | -----        |
| AT2G18042 (370)        |        | -----           | -----   | -----   | ----- | -----         | -----        |
| AT3G42565 (361)        |        | -----           | -----   | -----   | ----- | -----         | -----        |
| AT4G09545 (370)        |        | -----           | -----   | -----   | ----- | -----         | -----        |
| AT5G60978 (358)        |        | -----           | -----   | -----   | ----- | -----         | -----        |
| Consensus (2201)       |        | TGAGTTAACAATTTT | GAAAGCT | CAACTTT | GTGTA | TATTAAGATATTT | GGCAC        |

Section 46

|                        | (2251) | 2251        | 2261  |
|------------------------|--------|-------------|-------|
| ATSAT5Satellite (2186) |        | ATATATTGGAT |       |
| chr.2_SAT5 (947)       |        | -----       | ----- |
| chr.3_SAT5 (2179)      |        | -----       | ----- |
| Chr.4_SAT5 (1013)      |        | -----       | ----- |
| Chr.5_SAT5 (683)       |        | -----       | ----- |
| AT2G18042 (370)        |        | -----       | ----- |
| AT3G42565 (361)        |        | -----       | ----- |
| AT4G09545 (370)        |        | -----       | ----- |
| AT5G60978 (358)        |        | -----       | ----- |
| Consensus (2251)       |        | ATATATTGGAT |       |

## Supplementary Figure 2. Sequence alignments

The 2196 bp SAT5 (ATSAT5) consensus sequence [1] is shown together with the four dispersed SAT5 monomers containing *CRP* genes and the actual coding sequences of the four *CRP* genes or pseudogenes embedded in them (Table 1). Shading indicates sequence identity. Yellow shading indicates *CRP* coding regions. The flanking regions are AT-rich compared to the *CRP* coding sequence (Supplementary Table 2). These AT-rich flanking regions are likely to provide transcriptional regulatory regions and indeed putative TATA boxes (TATAAA between 420 and 430 bp) and poly-adenylation sites (AATAA located between 1021 and 1030 bp) can be detected in these sequences. Alignments were made using Vector NTI Advance11 from Invitrogen. Accession numbers for the single SAT5 monomers containing *CRP* genes or pseudogenes are as follows: chr2 SAT5 fragment containing At2g18042 pseudogene [EMBL:HE610172]; chromosome 3 SAT5 fragment containing At3g42565 gene [EMBL:HE610173]; chromosome 4 SAT5 fragment containing At4g09545 gene [EMBL:HE610174]; chromosome 5 SAT5 fragment containing At5g60978 pseudogene [EMBL:HE610175].

[1] Genetic Information Research Institute: **ATSAT5: A satellite-like sequence from chromosome 5 – a consensus**. *Rebase Reports* 2006, **6**: 50.
