# Supplementary material for: Atypical DNA methylation of genes encoding cysteine-rich peptides in Arabidopsis thaliana
Source: PubMed Central journal article supplement (PMC3422182; doi:10.1186/1471-2229-12-51), 2012-04-19
Supplement: 1471-2229-12-51-S3.pdf [file 1471-2229-12-51-S3.pdf]

**Supplementary Table 1. Methylation status of members of the CRP3600 subgroup**

| AGI       | Intron Number | Pseudogene | Start Position | End Position | Methylation status | SAT5 embedded |
|-----------|---------------|------------|----------------|--------------|--------------------|---------------|
| At2g14378 | 0             | F          | 6112313        | 6111951      | None               | No            |
| At2g18042 | 0             | T          | 7851529        | 7851897      | Transposon         | Yes           |
| At2g21905 | 0             | T          | 9346247        | 9346557      | Transposon         | No            |
| At2g24205 | 0             | F          | 10298498       | 10298842     | CG and CHG         | No            |
| At2g27315 | 0             | F          | 11697031       | 11696669     | CG                 | No            |
| At3g28985 | 0             | T          | 10999264       | 10999576     | Transposon         | No            |
| At3g42565 | 0             | F          | 14694396       | 14694037     | Transposon         | Yes           |
| At3g48675 | 0             | F          | 18045177       | 18045536     | None               | No            |
| At4g09545 | 0             | F          | 6037566        | 6037934      | Transposon         | Yes           |
| At4g35165 | 0             | F          | 16735297       | 16735659     | None               | No            |
| At5g17340 | 0             | F          | 5716220        | 5715738      | None               | No            |
| At5g36310 | 0             | F          | 14342288       | 14341941     | None               | Yes           |
| At5g36320 | 0             | F          | 14344487       | 14344131     | Transposon         | Yes           |
| At5g36330 | 0             | T          | 14346684       | 14346328     | Less               | Yes           |
| At5g36340 | 0             | F          | 14348863       | 14348516     | None               | Yes           |
| At5g36350 | 0             | F          | 14351059       | 14350703     | None               | Yes           |
| At5g36360 | 0             | F          | 14353254       | 14352898     | Less               | Yes           |
| At5g36370 | 0             | F          | 14355451       | 14355095     | None               | Yes           |
| At5g36380 | 0             | F          | 14357648       | 14357292     | None               | Yes           |
| At5g36390 | 0             | F          | 14359843       | 14359487     | None               | Yes           |
| At5g36400 | 0             | F          | 14362038       | 14361682     | None               | Yes           |
| At5g36410 | 0             | F          | 14364233       | 14363877     | None               | Yes           |
| At5g36420 | 0             | F          | 14366428       | 14366072     | None               | Yes           |
| At5g36430 | 0             | F          | 14368623       | 14368267     | None               | Yes           |
| At5g36440 | 0             | F          | 14370819       | 14370463     | None               | Yes           |
| At5g36450 | 0             | F          | 14373016       | 14372660     | None               | Yes           |
| At5g36460 | 0             | F          | 14375212       | 14374856     | Less               | Yes           |
| At5g36470 | 0             | F          | 14377409       | 14377053     | None               | Yes           |
| At5g36480 | 0             | F          | 14379606       | 14379250     | Less               | Yes           |
| At5g36490 | 0             | F          | 14381803       | 14381447     | None               | Yes           |
| At5g36500 | 0             | F          | 14384000       | 14383644     | None               | Yes           |
| At5g36510 | 0             | T          | 14386198       | 14385842     | Less               | Yes           |
| At5g36520 | 0             | F          | 14388400       | 14388044     | None               | Yes           |
| At5g36530 | 0             | T          | 14390594       | 14390238     | Less               | Yes           |
| At5g36540 | 0             | F          | 14392787       | 14392431     | None               | Yes           |
| At5g36550 | 0             | F          | 14394980       | 14394624     | None               | Yes           |
| At5g36657 | 0             | F          | 14401406       | 14401107     | CG and CHG         | Yes           |
| At5g36658 | 0             | F          | 14403658       | 14403302     | CG and CHG         | Yes           |
| At5g36659 | 0             | F          | 14405851       | 14405552     | CG                 | Yes           |
| At5g36661 | 0             | F          | 14408015       | 14407659     | None               | Yes           |
| At5g36662 | 0             | F          | 14410205       | 14409849     | None               | Yes           |
| At5g36738 | 0             | F          | 14467314       | 14466958     | None               | Yes           |
| At5g36739 | 0             | F          | 14469504       | 14469148     | None               | Yes           |
| At5g42895 | 0             | F          | 17214023       | 17214391     | Transposon         | No            |
| At5g44495 | 0             | F          | 17943937       | 17943578     | Transposon         | No            |

|           |   |   |          |          |            |     |
|-----------|---|---|----------|----------|------------|-----|
| At5g44555 | 0 | T | 17962036 | 17962394 | Transposon | No  |
| At5g48210 | 0 | F | 19565685 | 19565996 | None       | No  |
| At5g51105 | 0 | F | 20794858 | 20795229 | None       | No  |
| At5g52965 | 0 | F | 21496067 | 21496429 | None       | No  |
| At5g52975 | 0 | F | 21498740 | 21499105 | None       | No  |
| At5g53742 | 0 | F | 21830897 | 21831244 | Less       | No  |
| At5g53905 | 2 | F | 21906480 | 21905374 | None       | No  |
| At5g54062 | 0 | F | 21956083 | 21956706 | None       | No  |
| At5g60945 | 0 | F | 24543524 | 24543862 | Transposon | No  |
| At5g60964 | 0 | F | 24547812 | 24548150 | Transposon | No  |
| At5g60978 | 0 | T | 24559725 | 24560081 | Transposon | Yes |

There are 57 members of the CRP3600 subgroup [1]. The Arabidopsis Genome Initiative (AGI) numbers, intron numbers, designations as either gene or pseudogene, and genomic coordinates are taken from Supplementary Figure 2 of the study by Silverstein and coworkers [1]. The methylation status has been determined from our bisulfite data for At4g09545 and from the publicly available methylome data of Lister and coworkers [2]. A ‘Transposon’ methylation pattern indicates relatively dense CG, CHG and CHH methylation in the gene body. ‘Less’ indicates a similar pattern but reduced methylation. Genes or pseudogenes shown in red letters are mentioned in our study. Those shown in blue letters are present in the repeat block of SAT5 monomers close to the centromere of chromosome 5.

[1] Silverstein KA, Moskal WA Jr, Wu HC, Underwood BA, Graham MA, Town CD, VandenBosch KA: **Small cysteine-rich peptides resembling antimicrobial peptides have been under-predicted in plants.** *Plant J* 2007, **51**:262-280.

[2] <http://neomorph.salk.edu/epigenome/epigenome.html>
