# Supplementary material for: Atypical DNA methylation of genes encoding cysteine-rich peptides in Arabidopsis thaliana
Source: PubMed Central journal article supplement (PMC3422182; doi:10.1186/1471-2229-12-51), 2012-04-19
Supplement: 1471-2229-12-51-S4.pdf [file 1471-2229-12-51-S4.pdf]

**Supplementary Table 2. Sequence composition of dispersed SAT5 monomers containing *CRP* genes and pseudogenes**

|             |     | upstream region |        | <i>CRP</i> coding region |        | downstream region |        |
|-------------|-----|-----------------|--------|--------------------------|--------|-------------------|--------|
| Chr.2       | A   | 139             | 33,57% | 95                       | 25,75% | 302               | 40,54% |
| (At2g18042) | C   | 57              | 13,77% | 80                       | 21,68% | 73                | 9,80%  |
| pseudogene  | G   | 51              | 12,32% | 66                       | 17,89% | 79                | 10,60% |
|             | T   | 167             | 40,34% | 128                      | 34,69% | 291               | 39,06% |
|             | A+T |                 | 73,91% |                          | 60,44% |                   | 79,60% |
| Chr.3       | A   | 177             | 35,98% | 93                       | 25,83% | 154               | 37,75% |
| (At3g42565) | C   | 72              | 14,63% | 80                       | 22,22% | 46                | 11,27% |
| gene        | G   | 60              | 12,20% | 61                       | 16,94% | 49                | 12,01% |
|             | T   | 183             | 37,20% | 126                      | 35,00% | 159               | 38,97% |
|             | A+T |                 | 73,18% |                          | 60,83% |                   | 76,72% |
| Chr.4       | A   | 150             | 34,64% | 95                       | 25,75% | 75                | 35,89% |
| (At4g09545) | C   | 60              | 13,86% | 83                       | 22,49% | 27                | 12,92% |
| gene        | G   | 46              | 10,62% | 63                       | 17,07% | 18                | 8,61%  |
|             | T   | 177             | 40,88% | 128                      | 34,69% | 89                | 42,58% |
|             | A+T |                 | 75,52% |                          | 60,44% |                   | 78,47% |
| Chr.5       | A   | 66              | 39,05% | 98                       | 27,45% | 100               | 34,17% |
| (At5g60978) | C   | 32              | 18,93% | 75                       | 21,01% | 41                | 12,85% |
| pseudogene  | G   | 14              | 8,28%  | 60                       | 16,81% | 32                | 10,03% |
|             | T   | 57              | 33,73% | 124                      | 34,73% | 137               | 42,95% |
|             | A+T |                 | 72,78% |                          | 62,18% |                   | 77,12% |

The numbers of A, C, G and Ts in the indicated regions (upstream region, *CRP* coding region, downstream region) of the SAT5 monomers containing *CRP* genes or pseudogenes (AGI numbers given in column one) are shown together with the percentages for each nucleotide. The percent AT for each region is highlighted in red letters. The two flanking regions are more AT-rich than the *CRP* coding regions.
